# Supplementary material
Source: PubMed Central journal article supplement (PMC2714209)
Supplement: blood-2008-12-191296_1.pdf [file blood-2008-12-191296_1.pdf]

| <b>Tetramer/pentamer</b> | <b>Epitope Sequence</b> | <b>HIV Protein</b> | <b>HXB2 location</b> |
|--------------------------|-------------------------|--------------------|----------------------|
| A*0201 SL9               | SLYNTVATL               | p17                | 77-85                |
| A*0201 IV9               | ILKEPVHGV               | RT                 | 309-317              |
| A*0301 RK9               | RLRPGGKKK               | p17                | 20-28                |
| A*0301 QK10              | QVPLRPMTYK              | nef                | 73-82                |
| A*1101 AK11              | ACQGVGGPGHK             | p24                | 217-227              |
| B*0702 GL9               | GPGHKARVL               | p24                | 223-231              |
| B*0702 IL9               | IPRRIRQGL               | Env -gp160         | 843-851              |
| B*0801 EI8               | EIYKRWII                | p24                | 128-135              |
| B*0801 FL8               | FLKEKGGL                | Nef                | 90-97                |
| B*2705 KK10              | KRWIILGLNK              | p24                | 131-140              |
| B*5701 KF11              | KAFSPEVIPMF             | p24                | 30-40                |
| B*5701 TW10              | TSTLQEQIGW              | p24                | 108-117              |
